# Supplementary figures and images for: tRNA Signatures Reveal a Polyphyletic Origin of SAR11 Strains among Alphaproteobacteria
Source: PLOS journal article supplement (doi:10.1371/journal.pcbi.1003454), 2014-02-27

## Frequency plots of residue in active site in HisRS

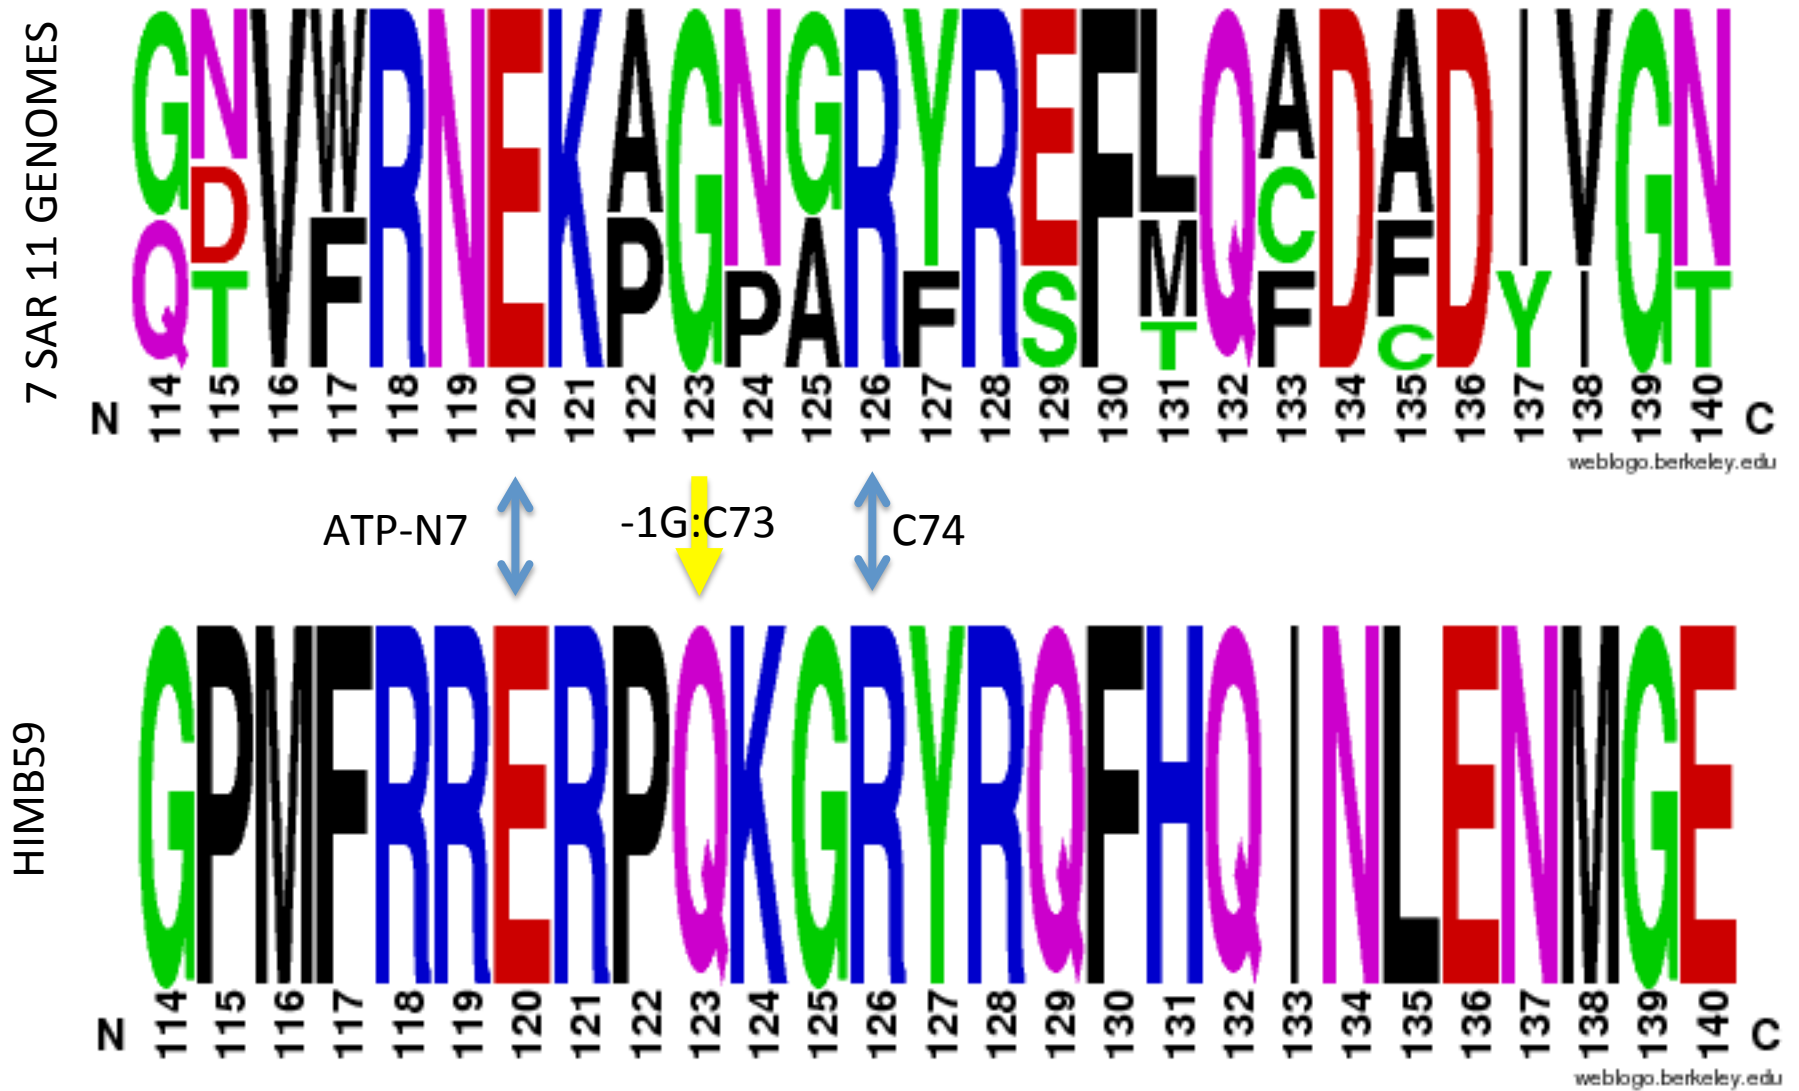

Supplement: S7 (10.1371/journal.pcbi.1003454.s007) [file journal.pcbi.1003454.s007]
